# Supplementary material
Source: Springer Nature journal article supplement (https://www.springermedizin.de/resource/supplementary/13014_2013_1224_MOESM7_ESM.pdf/9635184)

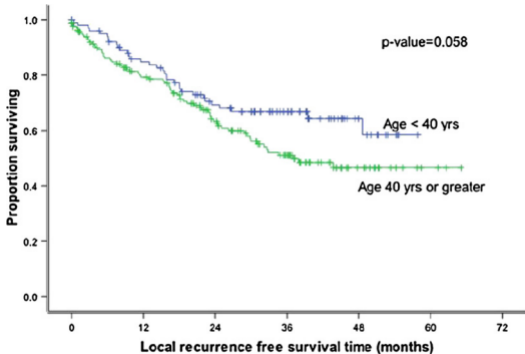

|                |     |     |    |    |    |   |     |
|----------------|-----|-----|----|----|----|---|-----|
| <40 yrs        | 105 | 80  | 57 | 35 | 11 | 0 | --- |
| 40 yrs or more | 168 | 113 | 76 | 46 | 15 | 3 | 0   |

Supplement: MOESM7 [file 9635184]
